# Supplementary material for: Generation of Functional Immortalized Human Corneal Stromal Stem Cells
Source: MDPI journal article supplement (doi:10.3390/ijms232113399), 2022-11-02
Supplement: s1 [file s1]

**Table S1:** List of primer pairs used for RT-PCR.

| Gene ID (name)                    | Forward 5'-3'            | Reverse 5'-3'            |
|-----------------------------------|--------------------------|--------------------------|
| <b>Adipogenic markers</b>         |                          |                          |
| <i>FABP4</i>                      | ATGGGATGGAAAATCAACCA     | GTGGAAGTGACGCCTTTCAT     |
| <i>PLIN</i>                       | AAACAGCATCAGCGTTCCCCA    | AGTGTTGGCAGCAAATTCCG     |
| <b>Osteogenic markers</b>         |                          |                          |
| <i>ALP</i>                        | TACAAGGTGGTGGGCGGTGAACGA | TGGCGCAGGGGCACAGCAGAC    |
| <i>SPARC</i>                      | GGCATCAAGCAGAAGGAT       | GCACCGTTAATGTATTCACT     |
| <b>Chondrogenic markers</b>       |                          |                          |
| <i>ACAN</i>                       | AGCCTGCGCTCCAATGACT      | TAATGGAACACGATGCCTTICA   |
| <i>COMP</i>                       | AGCAGATGGAGCAAACGTATTG   | ACAGCCTTGAGTTGGATGCC     |
| <b>Keratocyte-lineage markers</b> |                          |                          |
| <i>LUM</i>                        | CCTGGTTGAGCTGGATCTGT     | TGGTTTCTGAGATGCGATTG     |
| <i>KERA</i>                       | ATCTGCAGCACCTTCACCTT     | CATTGGAATTGGTGGTTTGA     |
| <i>PTGDS</i>                      | CGGGGTCCCTCGGCTCCTAC     | CTGGGGGTCTGGGTTTCGGCT    |
| <i>PAX6</i>                       | TGGGCAGGTATTACGAGACTG    | ACTCCCGCTTATACTGGGCTA    |
| <b>TSG-6 transcript</b>           |                          |                          |
| <i>TNFAIP6</i>                    | AAGCACGGTCTGGCAAATACAAGC | ATCCATCCAGCAGCACAGACATGA |
| <b>Housekeeping genes</b>         |                          |                          |
| <i>18S</i>                        | CCCTGTAATTGGAATGAGTCCAC  | GCTGGAATTACCGCGGCT       |
| <i>GAPDH</i>                      | ACAACCTTTGGTATCGTGGAAGG  | GCCATCACGCCACAGTTTC      |
